# Supplementary material
Source: publisher figshare collection journal article supplement (https://acs.figshare.com/ndownloader/files/11442350)
Supplement: Supplementary file 1 [file 11442350]

## Supporting Information

### **Self-Generated Nanoporous Silver Framework for High-Performance Iron Oxide Pseudocapacitor Anodes**

*Jae Young Seok, Jaehak Lee, and Minyang Yang\**

Department of Mechanical Engineering, Korea Advanced Institute of Science and Technology(KAIST), 291 Daehak-ro, Yuseong-gu, Daejeon 305-701, Republic of Korea

\*Corresponding author, E-mail: [myyang@kaist.ac.kr](mailto:myyang@kaist.ac.kr)

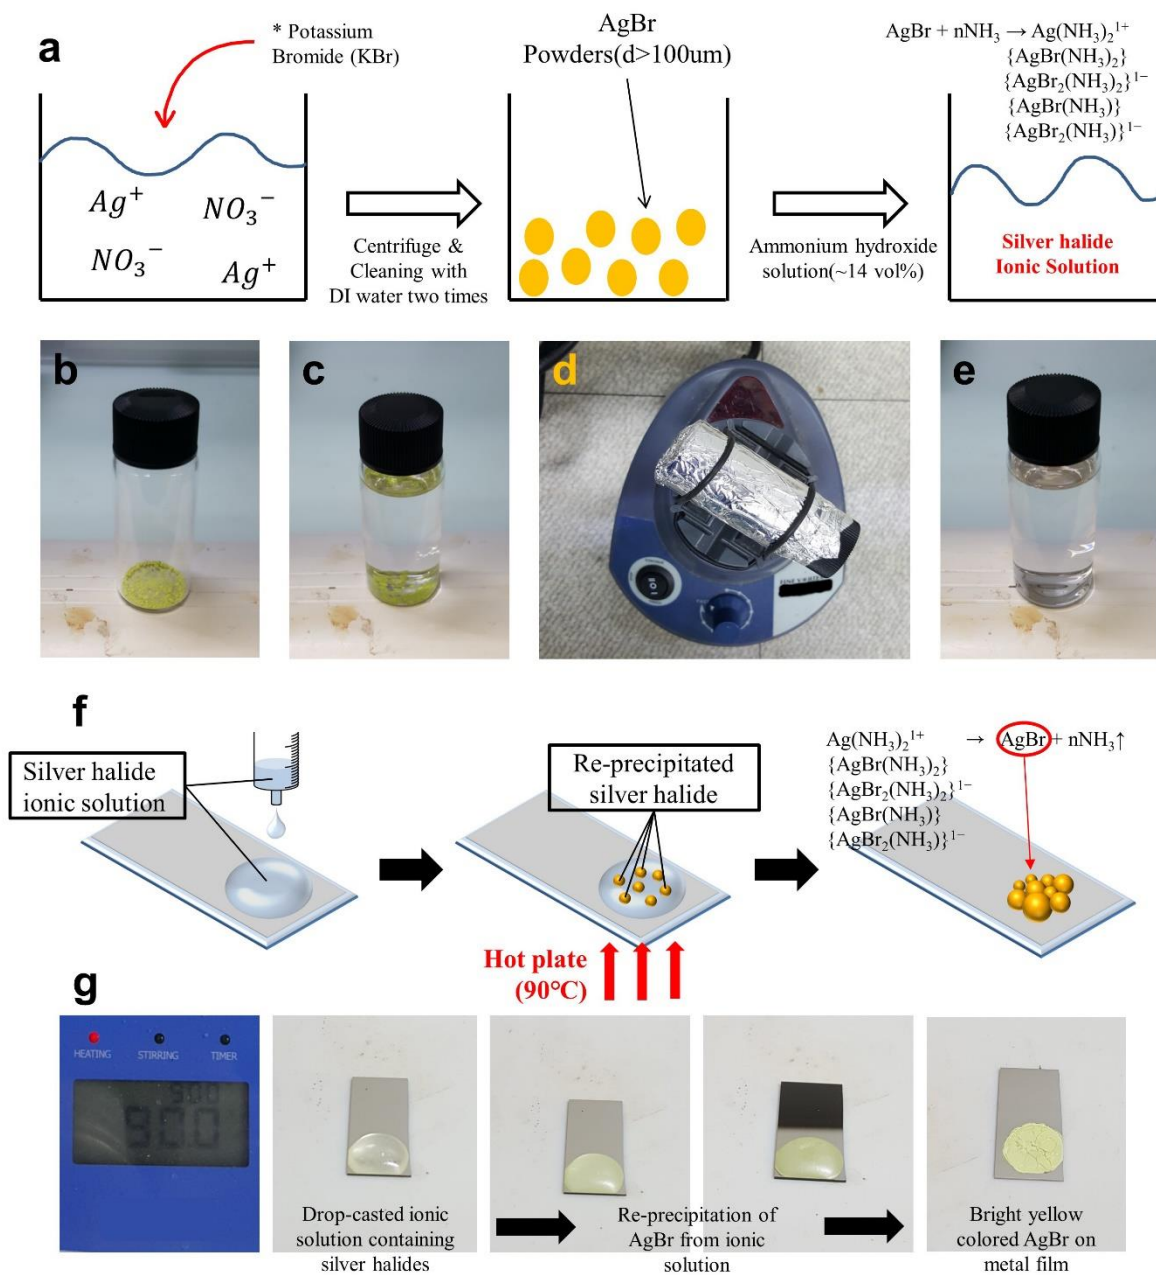

**Figure S1.** Experimental procedure for fabricating (a) a silver halide ion precursor solution and (b-e) its corresponding digital images. Schematic procedure for (f) deposition of silver halide by drop-casting of the precursor solution, and (g) its corresponding digital images.

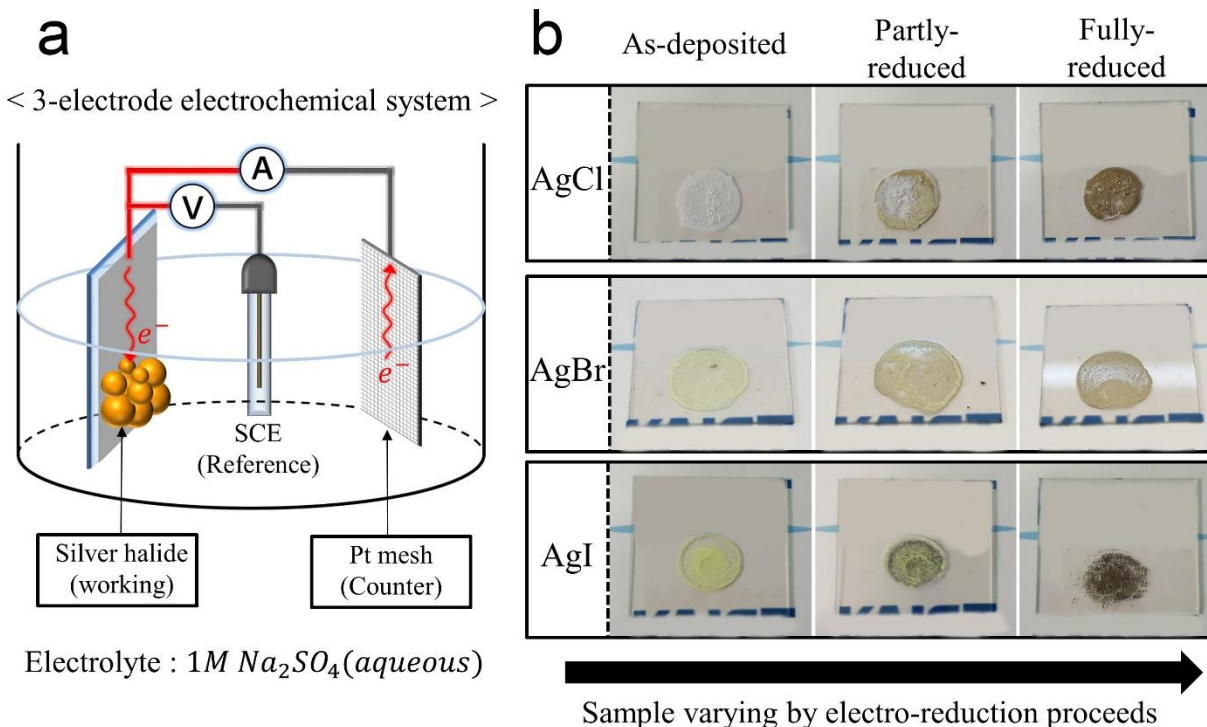

**Figure S2.** (a) Standard three-electrode electrochemical system composed of a saturated calomel electrode (SCE) as a reference and Pt mesh as a counter electrode. (b) Array of digital images of experimental samples for AgCl, AgBr, and AgI, in the as-deposited, partly reduced, and fully reduced states.

As a representative sample, the bright yellow AgBr particles changed to a brown-colored silver because the unique nanostructure affects the visible wavelength optical absorption properties.

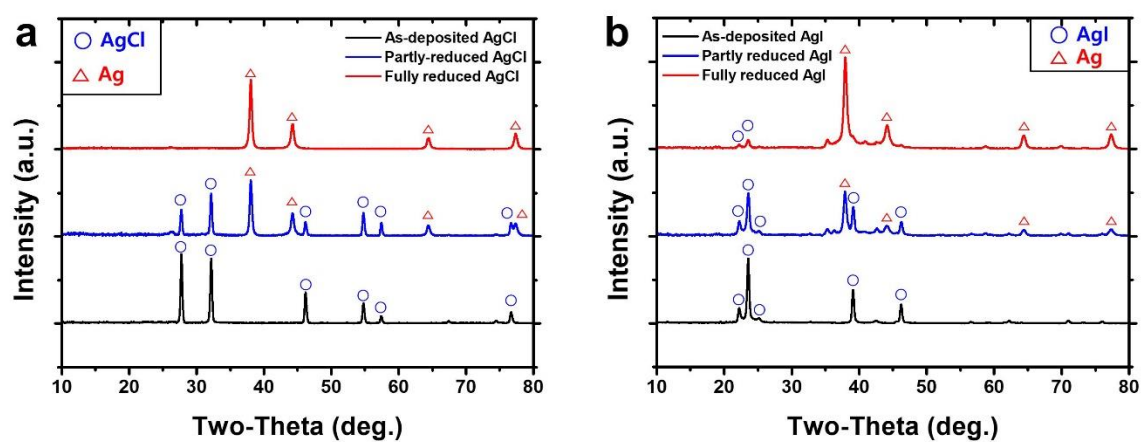

**Figure S3.** XRD results for the as-deposited state (black line), partly reduced state (blue line), and fully reduced state (red line) for the (a) AgCl and (b) AgI samples.

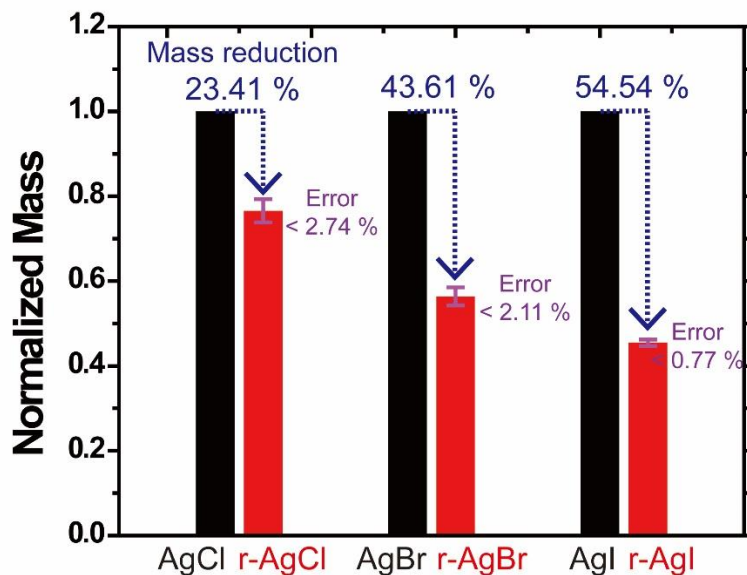

**Figure S4.** Mass variation ratio between the as-deposited state and fully reduced state of each AgCl, AgBr, and AgI samples.

The mass variation between as-deposited AgX and fully reduced AgX, and the mass decreasing rate (%) of each AgX sample is shown in the bar graph. When AgCl, AgBr, and AgI are reduced to pure Ag, the mass decreasing rates are stoichiometrically 25.4%, 43.1%, and 54.5%, respectively. The mass variation for the AgCl, AgBr, and AgI samples are 23.5%, 43.7%, and 54.5%, respectively, which is assumed to be identical to the stoichiometric values by considering the slight experimental error.

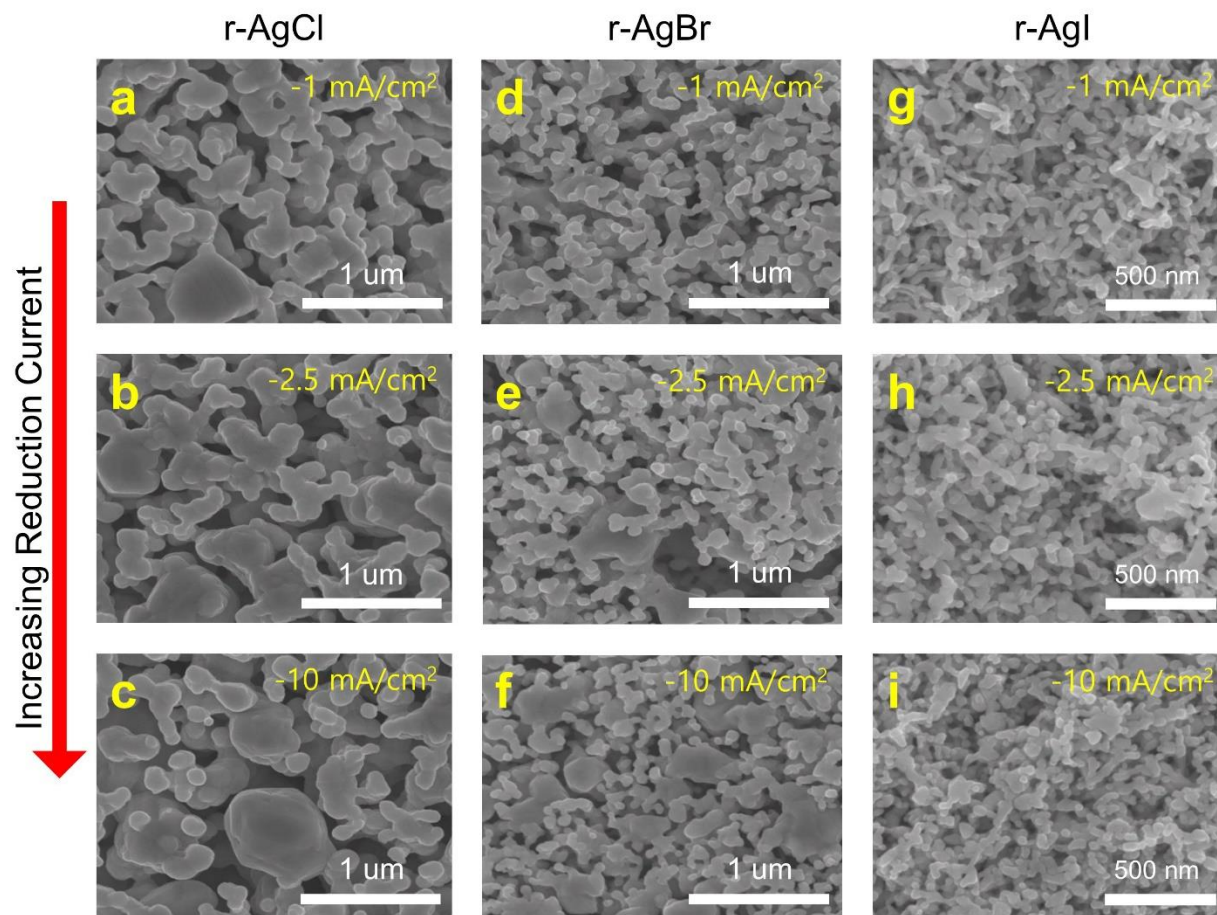

**Figure S5.** Structural formation with respect to the reduction current during the silver halide electroreduction process. High-magnification SEM images of (a-c) reduced AgCl, (d-f) reduced AgBr, and (g-i) reduced AgI with increasing reduction currents.



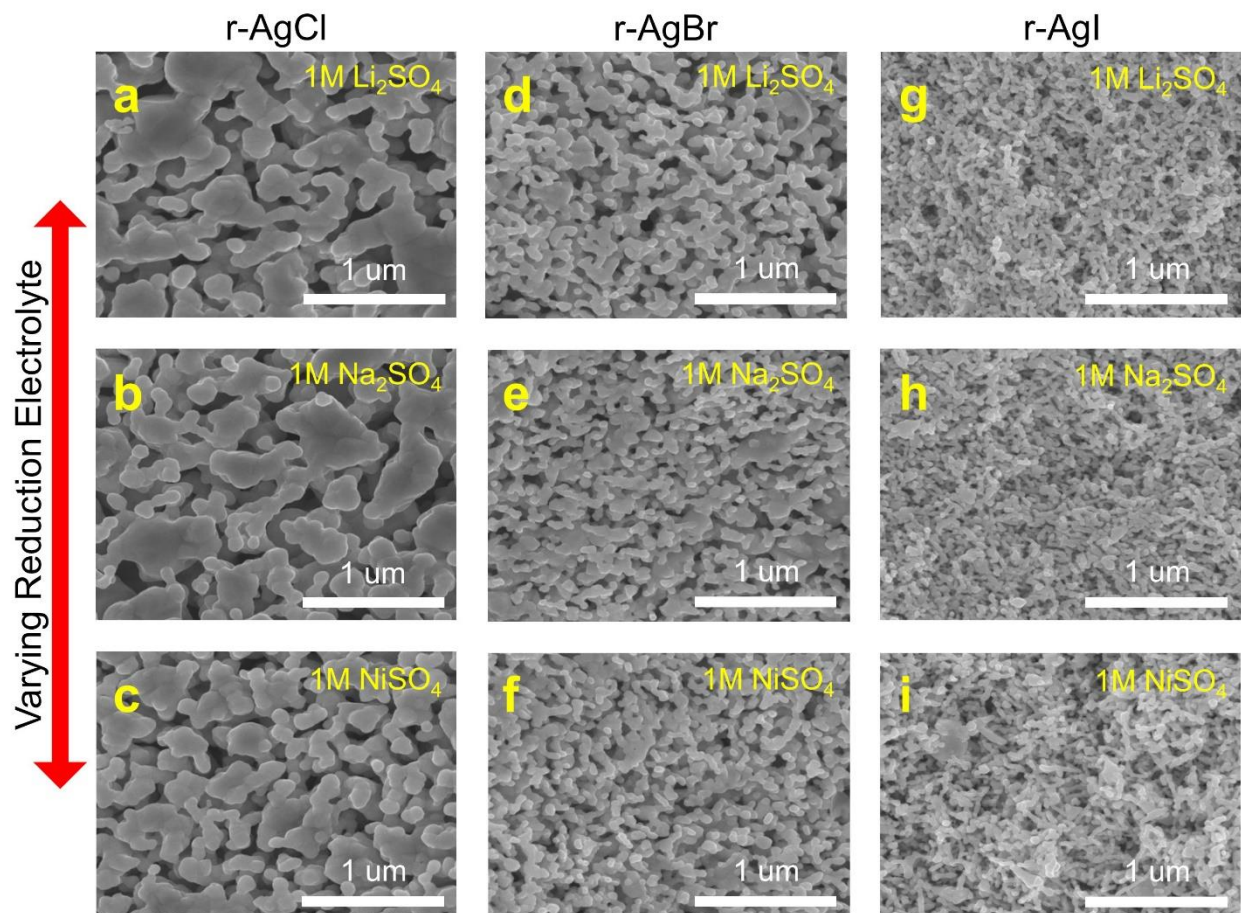

**Figure S6.** Structural formation differences caused by different reduction electrolytes during the silver halide electroreduction process. High-magnification SEM images of (a-c) reduced AgCl, (d-f) reduced AgBr, and (g-i) reduced AgI using different reduction electrolytes.

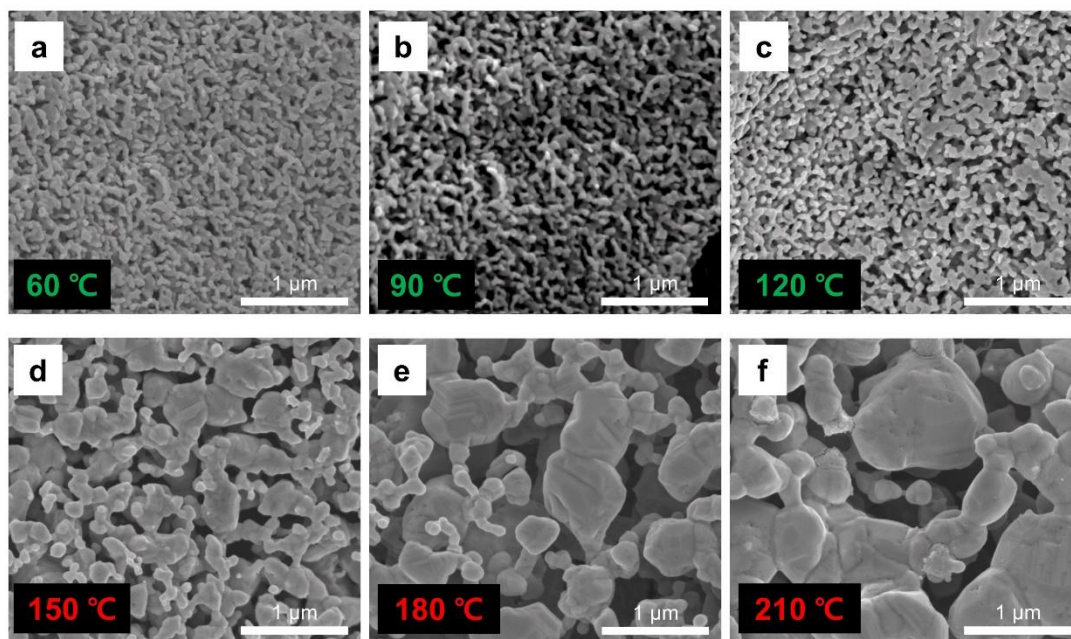

**Figure S7.** SEM images of the np-Ag framework to confirm thermal stability of np-Ag. Each sample was heat treated at (a) 60 °C, (b) 90 °C, (c) 120 °C, (d) 150 °C, (e) 180 °C and (f) 210 °C for 1 hour.

SEM images of the np-Ag sample heat-treated for 1 hour at each temperature are shown in Figure S7. The np-Ag framework is stable up to 120 °C, however above 150 °C, the np-Ag framework begins to aggregate with each other, forming a thicker, larger ligament structure. This tendency to agglomerate becomes more apparent when the heat treatment temperature is higher.



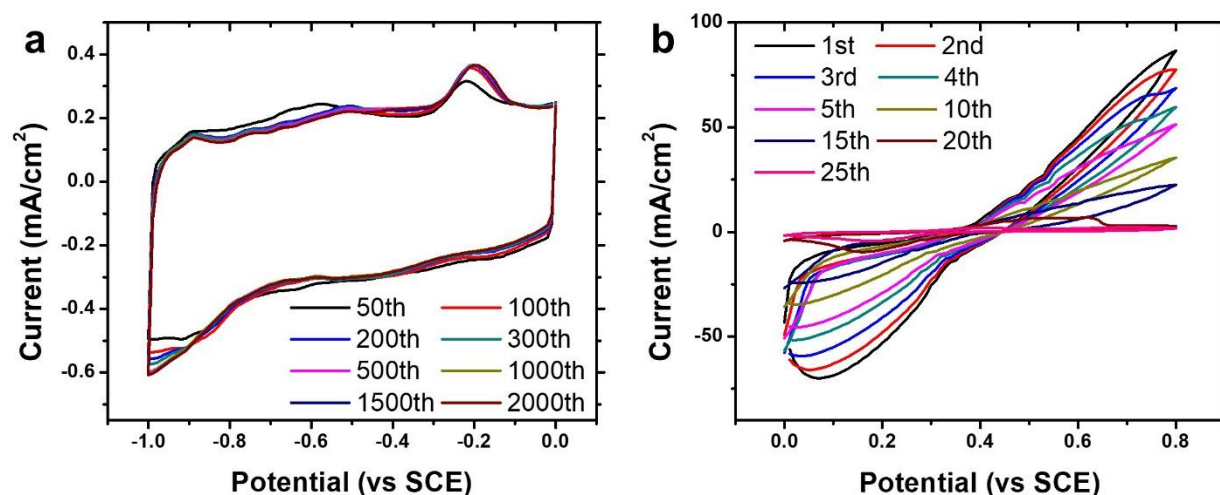

**Figure S8.** Cyclic voltammetry results of np-Ag framework to confirm electrochemical stability. Voltage window: (a) -1 – 0V, (b) 0 – 0.8V (vs. SCE).

Cyclic voltammetry results of np-Ag framework for each voltage window are shown in Figure S8. Here, the experimental configuration was as follows; SCE was used as a reference electrode, and a platinum foil was used as a counter electrode in a 2.5 M  $\text{Li}_2\text{SO}_4$  aqueous electrolyte. The np-Ag framework was very stable when the (-) potential was applied and the shape of the CV curve highly stable for over 2000 cycles (Figure S8a). On the other hand, the np-Ag framework degraded sharply when the (+) potential was applied above 0.6 V (Figure S8b). Since the oxidation potential of silver (Ag) is + 0.555 V (vs. SCE), silver was oxidized or dissolved in the electrolyte in the form of  $\text{Ag}^+$ . As a consequence, this np-Ag framework can be utilized with high stability as an anode material, but it can hardly be applied to a cathode material.

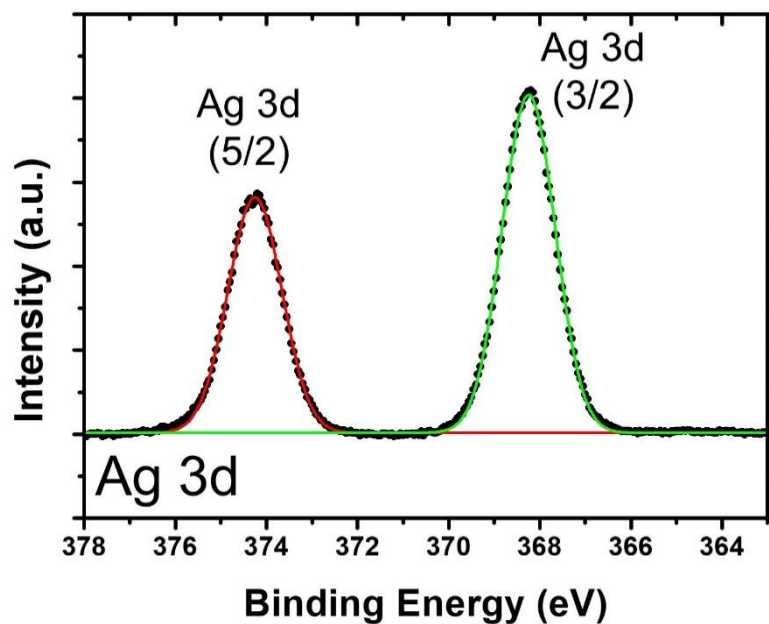

**Figure S9.** XPS spectrum of Ag 3d for the np-Ag@Fe<sub>2</sub>O<sub>3</sub> anode.

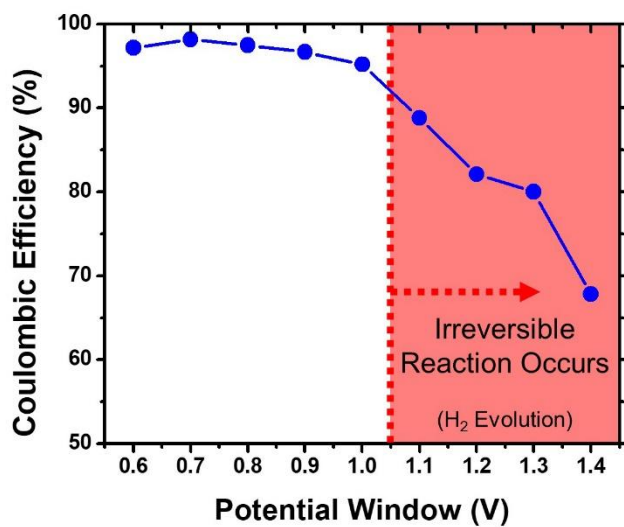

**Figure S10.** Coulombic efficiencies of np-Ag@Fe<sub>2</sub>O<sub>3</sub> electrode during charging/discharging with various potential window.

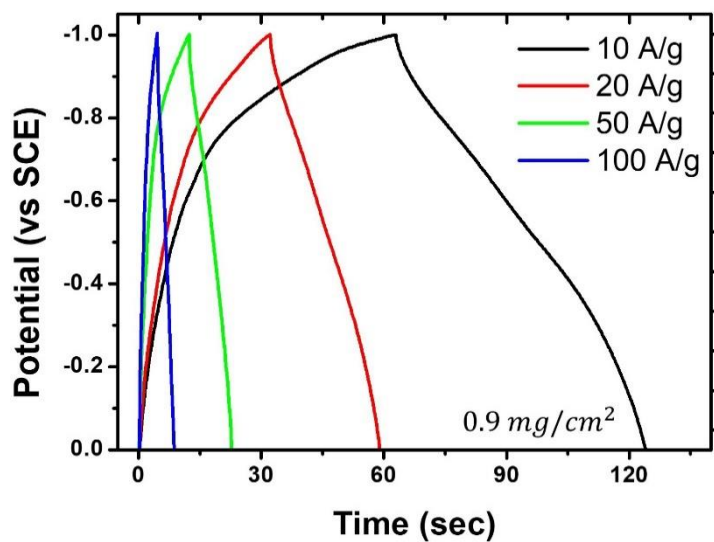

**Figure S11.** Galvanostatic charge-discharge curves of np-Ag@Fe<sub>2</sub>O<sub>3</sub> (with a mass loading of 0.9 mg cm<sup>-2</sup>) for each charging current density.

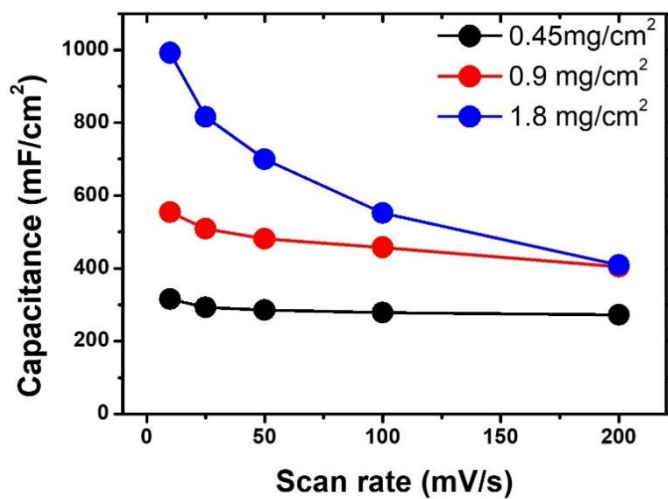

**Figure S12.** Rate capabilities of np-Ag@Fe<sub>2</sub>O<sub>3</sub> by varying the active material mass loading in terms of the areal specific capacitance.

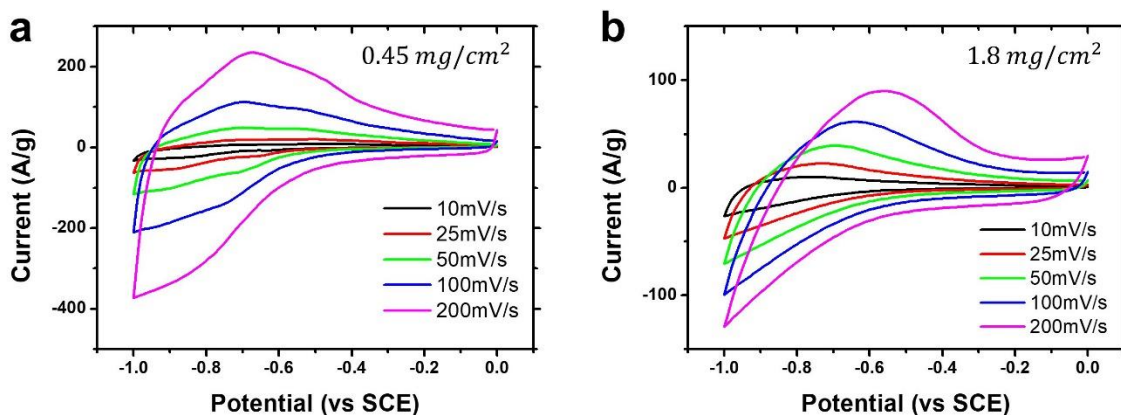

**Figure S13.** CV curves of the np-Ag@Fe<sub>2</sub>O<sub>3</sub> anodes at mass loadings of (a) 0.45 mg cm<sup>-2</sup> and (b) 1.8 mg cm<sup>-2</sup>.

**Table S1.** Comparison of the major figures of merit for np-Ag@Fe<sub>2</sub>O<sub>3</sub> using previously reported iron oxide-based (FeO<sub>x</sub>-based) electrochemical electrodes with respect to the specific capacitance and cycling performance.

| Electrode Structure                         | Electrolyte                            | Capacitance                                    | Cyclic stability         | Publication Year | Ref |
|---------------------------------------------|----------------------------------------|------------------------------------------------|--------------------------|------------------|-----|
| Fe <sub>2</sub> O <sub>3</sub> films        | 0.25 M Na <sub>2</sub> SO <sub>4</sub> | 210 F g <sup>-1</sup> @ 2 mV s <sup>-1</sup>   | ~68.4% after 100 cycles  | 2006             | [1] |
| Carbon Nanofoam@FeO <sub>x</sub>            | 2.5 M Li <sub>2</sub> SO <sub>4</sub>  | 84 F g <sup>-1</sup> @ 5 mV s <sup>-1</sup>    | ~80% after 1000 cycles   | 2010             | [2] |
| CNT@Fe <sub>3</sub> O <sub>4</sub>          | 1 M Na <sub>2</sub> SO <sub>4</sub>    | 165 F g <sup>-1</sup> @ 2 A g <sup>-1</sup>    | ~85.1% after 1000 cycles | 2011             | [3] |
| rGO@Fe <sub>2</sub> O <sub>3</sub> nanotube | 1 M Na <sub>2</sub> SO <sub>4</sub>    | 215 F g <sup>-1</sup> @ 2.5 mV s <sup>-1</sup> | ~90% after 2000 cycles   | 2012             | [4] |

|                                                              |                                       |                                                                                                  |                              |           |      |
|--------------------------------------------------------------|---------------------------------------|--------------------------------------------------------------------------------------------------|------------------------------|-----------|------|
| Carbon nanosheet@Fe <sub>3</sub> O <sub>4</sub>              | 1 M Na <sub>2</sub> SO <sub>4</sub>   | 163.4 F g <sup>-1</sup> @ 1 A g <sup>-1</sup>                                                    | ~93% after<br>5000 cycles    | 2013      | [5]  |
| Carbon-coated Fe <sub>3</sub> O <sub>4</sub> (core-shell)    | 1 M Na <sub>2</sub> SO <sub>4</sub>   | 275.9 F g <sup>-1</sup> @ 0.5 A g <sup>-1</sup>                                                  | ~81.2% after<br>500 cycles   | 2013      | [6]  |
| N-doped graphene@Fe <sub>2</sub> O <sub>3</sub>              | 1 M Na <sub>2</sub> SO <sub>4</sub>   | 260.1 F g <sup>-1</sup> @ 2 A g <sup>-1</sup>                                                    | ~82.5% after<br>1000 cycles  | 2014      | [7]  |
| Graphene@Fe <sub>2</sub> O <sub>3</sub>                      | 1 M KOH                               | 908 F g <sup>-1</sup> @ 2 A g <sup>-1</sup>                                                      | ~75% after<br>200 cycles     | 2014      | [8]  |
| Graphene paper@Fe <sub>3</sub> O <sub>4</sub>                | 1 M KOH                               | 368 F g <sup>-1</sup> @ 1 A g <sup>-1</sup>                                                      | ~90% after<br>1000 cycles    | 2014      | [9]  |
| GF-CNT@Fe <sub>2</sub> O <sub>3</sub>                        | 2 M KOH                               | 580.6 F g <sup>-1</sup> @ 5 A g <sup>-1</sup>                                                    | ~100% after<br>50000 cycles  | 2015      | [10] |
| Graphene aerogel@Fe <sub>2</sub> O <sub>3</sub>              | 6 M KOH                               | 393 F g <sup>-1</sup> @ 1.5 A g <sup>-1</sup>                                                    | ~81.5% after<br>2200 cycles  | 2016      | [11] |
| Grahene@Fe <sub>2</sub> O <sub>3</sub> nanoplate             | 1 M KOH                               | 510 F g <sup>-1</sup> @ 5 A g <sup>-1</sup>                                                      | ~70% after<br>1000 cycles    | 2016      | [12] |
| Hollow carbon@Fe <sub>3</sub> O <sub>4</sub>                 | 5 M LiCl                              | 193 F g <sup>-1</sup> @ 1 mV s <sup>-1</sup>                                                     | ~94.8% after<br>10000 cycles | 2017      | [13] |
| Nickel Nanotube@Fe <sub>2</sub> O <sub>3</sub> Nanoneedles   | 1 M Na <sub>2</sub> SO <sub>4</sub>   | 418.7 F g <sup>-1</sup> @ 10 mV s <sup>-1</sup>                                                  | ~93.3% after<br>5000 cycles  | 2017      | [14] |
| Carbon Cloth@FeOOH                                           | 2 M KOH                               | 796 F g <sup>-1</sup> @ 30 A g <sup>-1</sup>                                                     | ~91% after<br>10000 cycles   | 2017      | [15] |
| Graphene oxide@Fe <sub>2</sub> O <sub>3</sub> nanoparticle   | 3 M KOH                               | 91 F g <sup>-1</sup> @ 20 mV s <sup>-1</sup>                                                     | Not reported                 | 2017      | [16] |
| Carbon Cloth@Fe <sub>2</sub> O <sub>3</sub> Nanorod@Graphene | 1 M LiOH                              | 701 F g <sup>-1</sup> @ 6 A g <sup>-1</sup>                                                      | ~91% after<br>5000 cycles    | 2018      | [17] |
| Nanoporous silver@Fe <sub>2</sub> O <sub>3</sub>             | 2.5 M Li <sub>2</sub> SO <sub>4</sub> | 616 F g <sup>-1</sup> @ 10 mV s <sup>-1</sup><br>(608 F g <sup>-1</sup> @ 10 A g <sup>-1</sup> ) | ~85% after<br>6000 cycles    | This work | -    |



## REFERENCES

- [1] Nagarajan, N.; Zhitomirsky, I. Cathodic Electrosynthesis of Iron Oxide Films for Electrochemical Supercapacitors. *J. Appl. Electrochem.* **2006**, *36*, 1399-1405.
- [2] Sassin, M. B.; Mansour, A. N.; Pettigrew, K. A.; Rolison, D. R.; Long, J. W. Electroless Deposition of Conformal Nanoscale Iron Oxide on Carbon Nanoarchitectures for Electrochemical Charge Storage. *ACS Nano* **2010**, *4*, 4505-4514.
- [3] Kim, Y. H.; Park, S. J. Roles of Nanosized Fe<sub>3</sub>O<sub>4</sub> on Supercapacitive Properties of Carbon Nanotubes. *Current Applied Physics* **2011**, *11*, 462-466.
- [4] Lee, K. K.; Deng, S.; Fan, H. M.; Mhaisalkar, S.; Tan, H. R.; Tok, E. S.; Loh, K. P.; Chin, W. S.; Sow, C. H.  $\alpha$ -Fe<sub>2</sub>O<sub>3</sub> Nanotubes-Reduced Graphene Oxide Composites as Synergistic Electrochemical Capacitor Materials. *Nanoscale* **2012**, *4*, 2958-2961.
- [5] Liu, D.; Wang, X.; Wang, X.; Tian, W.; Liu, J.; Zhi, C.; He, D.; Bando, Y.; Golberg, D. Ultrathin Nanoporous Fe<sub>3</sub>O<sub>4</sub>-Carbon Nanosheets with Enhanced Supercapacitor Performance. *J. Mater. Chem. A* **2013**, *1*, 1952-1955.
- [6] Liu, J.; Liu, S.; Zhuang, S.; Wang, X.; Tu, F. Synthesis of Carbon-Coated Fe<sub>3</sub>O<sub>4</sub> Nanorods as Electrode Material for Supercapacitor. *Ionics* **2013**, *19*, 1255-1261.
- [7] Zhao, P.; Li, W.; Wang, G.; Yu, B.; Li, X.; Bai, J.; Ren, Z. Facile Hydrothermal Fabrication of Nitrogen-Doped Graphene/Fe<sub>2</sub>O<sub>3</sub> Composites as High Performance Electrode Materials for Supercapacitor. *J. Alloys Compd.* **2014**, *604*, 87-93.
- [8] Wang, H.; Xu, Z.; Yi, H.; Wei, H.; Guo, Z.; Wang, X. One-Step Preparation of Single-Crystalline Fe<sub>2</sub>O<sub>3</sub> Particles/Graphene Composite Hydrogels as High Performance Anode Materials for Supercapacitors. *Nano Energy* **2014**, *7*, 86-96.
- [9] Liu, M.; Sun, J. In situ Growth of Monodisperse Fe<sub>3</sub>O<sub>4</sub> Nanoparticles on Graphene as Flexible Paper for Supercapacitor. *J. Mater. Chem. A* **2014**, *2*, 12068-12074.
- [10] Guan, C.; Liu, J.; Wang, Y.; Mao, L.; Fan, Z.; Shen, Z.; Zhang, H.; Wang, J. Iron Oxide-Decorated Carbon for Supercapacitor Anodes with Ultrahigh Energy Density and Outstanding Cycling Stability. *ACS Nano* **2015**, *9*, 5198-5207.
- [11] Khattak, A. M.; Yin, H.; Ghazi, Z. A.; Liang, B.; Iqbal, A.; Khan, N. A.; Gao, Y.; Li, L.; Tang, Z. Three Dimensional Iron Oxide/Graphene Aerogel Hybrids as All-Solid-State Flexible Supercapacitor Electrodes. *RSC Adv.* **2016**, *6*, 58994-59000.
- [12] Quan, H.; Cheng, B.; Xiao, Y.; Lei, S. One-Pot Synthesis of  $\alpha$ -Fe<sub>2</sub>O<sub>3</sub> Nanoplates-Reduced Graphene Oxide Composites for Supercapacitor Application. *Chem. Eng. J.* **2016**, *286*, 165-173.
- [13] Shi, X.; Zhang, S.; Chen, X.; Tang, T.; Mijowska, E. Effect of Iron Oxide Impregnated in Hollow Carbon Sphere as Symmetric Supercapacitors. *J. Alloys Compd.* **2017**, *726*, 466-473.

- [14] Li, Y.; Xu, J.; Feng, T.; Yao, Q.; Xie, J.; Xia, H. Fe<sub>2</sub>O<sub>3</sub> Nanoneedles on Ultrafine Nickel Nanotube Arrays as Efficient Anode for High-Performance Asymmetric Supercapacitors. *Adv. Funct. Mater.* **2017**, *27*, 1606728.
- [15] Owusu, K. A.; Qu, L.; Li, J.; Wang, Z.; Zhao, K.; Yang, C.; Hercule, K. M.; Lin, C.; Shi, C.; Wei, Q.; Zhou, L.; Mai, L. Low-crystalline iron oxide hydroxide nanoparticle anode for high-performance supercapacitors. *Nat. Commun.* **2017**, *8*, 14264.
- [16] Tanaka, S.; Salunkhe, R. R.; Kaneti, Y. V.; Malgras, V.; Alsehri, S. M.; Ahamad, T.; Zakaria, M. B.; Dou, S. X.; Yamauchi, Y.; Hossain, M. A. Prussian Blue Derived Iron Oxide Nanoparticles Wrapped in Graphene Oxide Sheets for Electrochemical Supercapacitors. *RSC Adv.* **2017**, *7*, 33994-33999.
- [17] Sun, S.; Zhai, T.; Liang, C.; Savilov, S. V.; Xia, H. Boosted crystalline/amorphous Fe<sub>2</sub>O<sub>3</sub>-<sub>8</sub> core/shell heterostructure for flexible solid-state pseudocapacitors in large scale. *Nano Energy* **2018**, *45*, 390-397.
